# Supplementary material
Source: Springer Nature journal article supplement (https://www.springermedizin.de/resource/supplementary/13063_2014_2078_MOESM2_ESM.pdf/9621322)

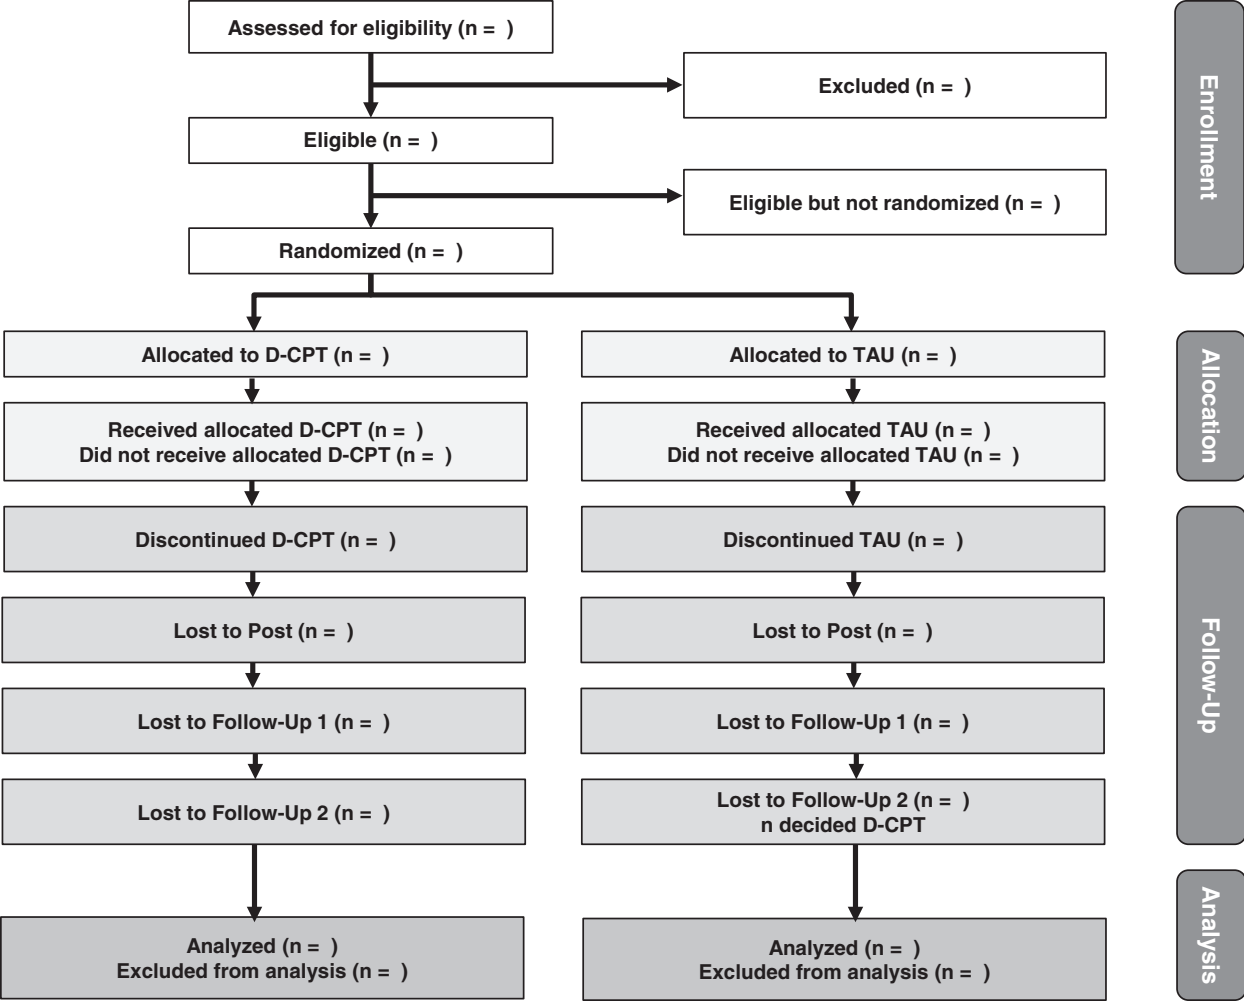

Supplement: MOESM2 [file 9621322]
